# Supplementary material for: Control of swelling–deswelling behavior of a self-oscillating gel by designing the chemical structure
Source: Royal Society of Chemistry journal article supplement (doi:10.1039/c4ra10675j), 2014-12-12
Supplement: c4ra10675j1.pdf [file c4ra10675j1.pdf]

## Supporting Information

Control of swelling-deswelling behavior of self-oscillating gel by designing the  
chemical structure

*Tsukuru Masuda, Ayako Terasaki, Aya Mizutani Akimoto, Kenichi Nagase,  
Teruo Okano and Ryo Yoshida\**

### **Experimental**

#### ***Preparation of the calibration curve to determine the amount of Ru(bpy)<sub>3</sub> conjugated to the polymer***

The calibration curve was independently made from aqueous solutions of Ru(bpy)<sub>3</sub>Cl<sub>2</sub> with known concentrations. The absorbance spectra of the aqueous solutions of Ru(bpy)<sub>3</sub>Cl<sub>2</sub> were measured by using a UV-vis measurement spectroscopy. Here, the absorbance at 700 nm ( $A_{700}$ ) was defined as the baseline (i.e.  $A_{700} = 0$ ), because there are no peak at 700 nm.

#### ***Measurements of swelling and deswelling kinetics***

The kinetics of the ternary self-oscillating gel was measured as the following reference. The gel was immersed in the aqueous solution containing HNO<sub>3</sub> (810 mM) and NaCl (104 mM), and stabilized at 20 °C. Swelling kinetics were measured by exchanging the external solution to the aqueous solution containing HNO<sub>3</sub> (810 mM) and NaBrO<sub>3</sub> (104 mM). Deswelling kinetics were measured by exchanging the solution to the solution containing HNO<sub>3</sub> (810 mM), NaCl (104 mM), and MA (84 mM). Swelling or deswelling process of the gels were recorded by a digital video recorder through a CCD camera (Toshiba Teli, CS5270B) attached to a microscope (MZ16, Leica).

Reference:

[S1] R. Mitsunaga, K. Okeyoshi, R. Yoshida, *Chem. Commun.* 2013, **49**, 4935.

### Supporting Results

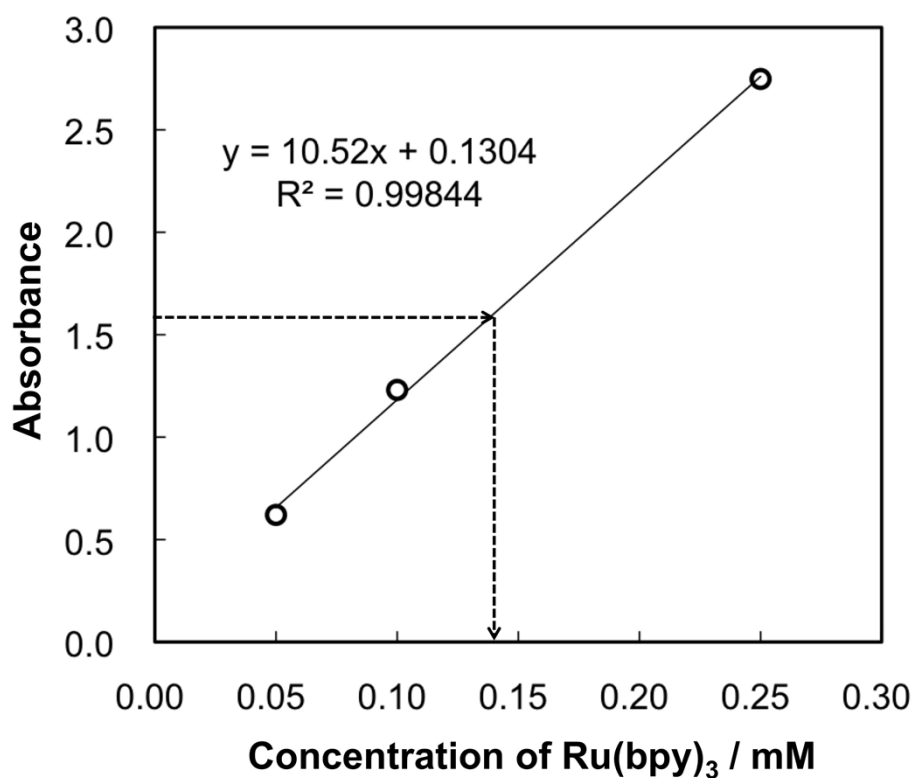

**Fig. S1** Calibration curve to determine the amount of Ru(bpy)<sub>3</sub> conjugated to the polymer. The calibration curve was independently made from aqueous solutions of Ru(bpy)<sub>3</sub>Cl<sub>2</sub> with known concentrations.

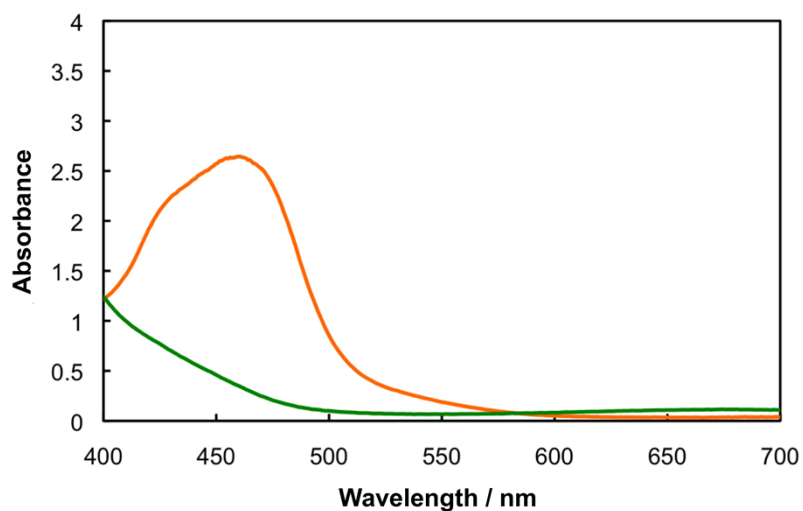

**Fig. S2** Absorbance spectra for poly(NIPAAm-co-NAPMAm-co-Ru(bpy)<sub>3</sub>NAPMAm) solutions (0.05 wt%) under the different conditions of the reduced Ru(II) state and oxidized Ru(III) state.

a) Ternary self-oscillating polymer

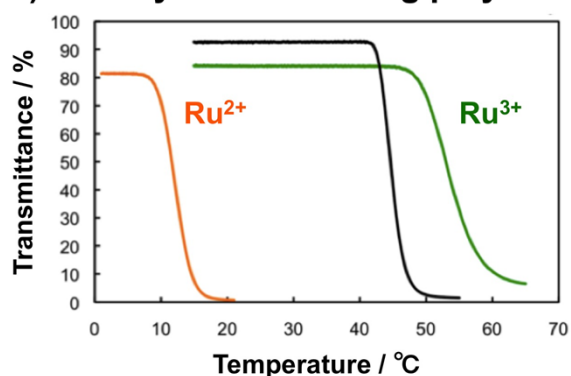

b) Conventional

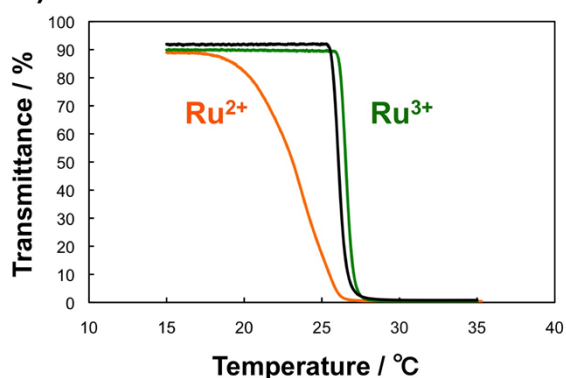

**Fig. S3** Temperature dependence of optical transmittance for (a) the ternary self-oscillating polymer and poly(NIPAAm-*co*-NAPMAm) (black line), and (b) the conventional self-oscillating polymer (poly(NIPAAm-*co*-Ru(bpy)<sub>3</sub>) and polyNIPAAm (black line) in aqueous solution containing 1 M HNO<sub>3</sub>.

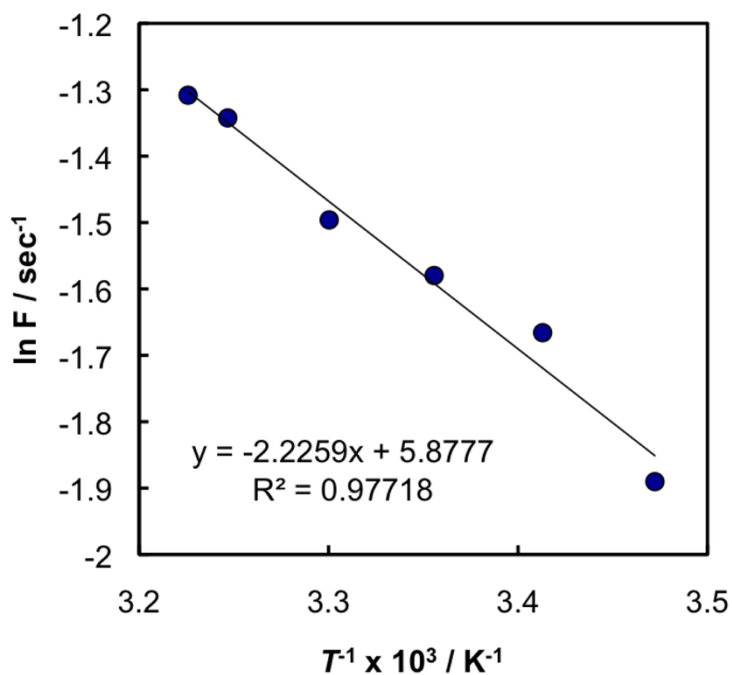

**Fig. S4** Arrhenius plot of the self-oscillation of linear polymer.

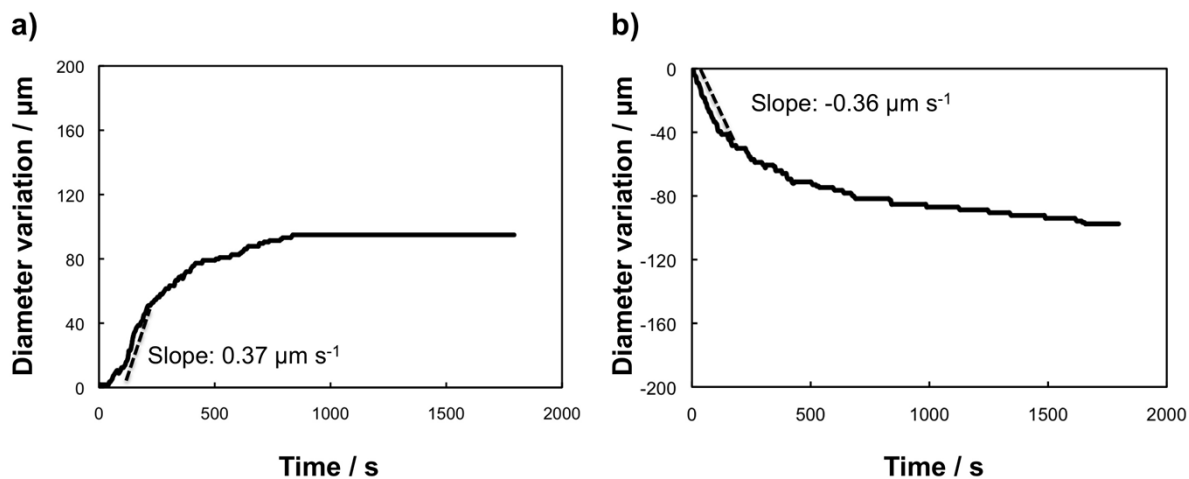

**Fig. S5** The kinetics of PNNR-5-(100%) in (a) swelling process and (b) deswelling process. The initial rates were shown in the figure.

**Table S1** Kinetics of ternary self-oscillating gel (PNNR5-(100%)) and conventional gel.

| Gel                                          | Swelling process          | Deswelling process        |
|----------------------------------------------|---------------------------|---------------------------|
| Ternary self-oscillating gel (PNNR-5-(100%)) | 0.37 $\mu\text{m s}^{-1}$ | 0.36 $\mu\text{m s}^{-1}$ |
| Conventional gel <sup>S1</sup>               | 0.11 $\mu\text{m s}^{-1}$ | 0.07 $\mu\text{m s}^{-1}$ |

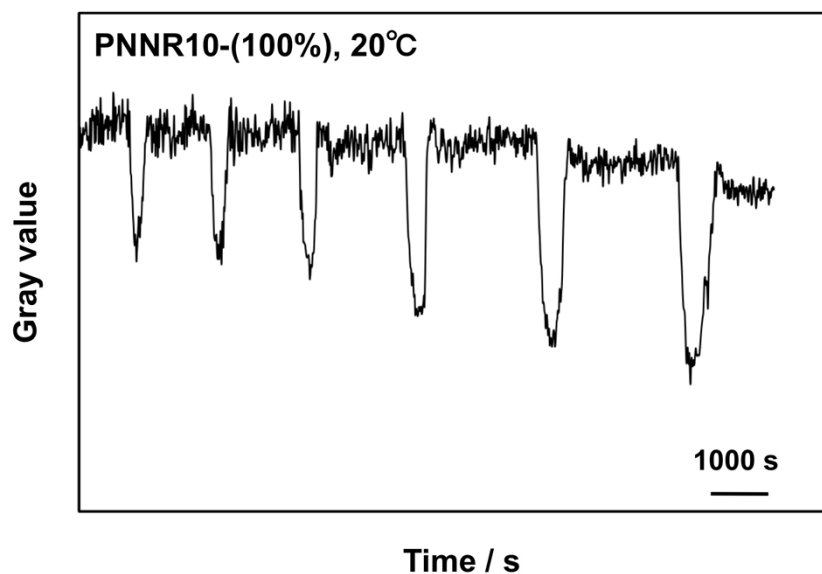

**Fig. S6** Oscillating profile of the gray value of PNNR-10-(100%) at 20 °C.
